# Supplementary material for: Lanthanide ternary mixed-ligand coordination polymers as fluorescent sensors for the sensitive and selective detection of chlorogenic acid
Source: Royal Society of Chemistry journal article supplement (doi:10.1039/d2ce00954d), 2022-01-01
Supplement: d2ce00954d1.pdf [file d2ce00954d1.pdf]

## SUPPORTING INFORMATION

### 1. Materials and methods

All reagents were commercially purchased and used without further purification. Powder X-ray diffraction (PXRD) was carried out on a PANalytical X'pert PRO MPD diffractometer with Mo K $\alpha$  radiation ( $\lambda=0.71073\text{\AA}$ ). Infrared (IR) spectrum using KBr pellets were produced by a Bruker Tensor 37 spectrophotometer. Thermogravimetric analyses (TGA) were carried out using a HCT-2 thermal analyzer with a heating rate of  $10^{\circ}\text{C min}^{-1}$ . The fluorescence spectrum were recorded on an FL7000 fluorescence spectrophotometer (Japan Hitachi company). The UV-vis spectrum were recorded by U-3900H spectrophotometer (Japan Hitachi company). DFT calculations were performed at the B3LYP/6-311G\*\* level of the Gaussian 09 program.

### 2. Crystallography

The crystal diffraction data for complexes **1-5** were collected on a Bruker Apex II CCD diffractometer with graphite monochromated Mo K $\alpha$  radiation at 293(2) K. The SADABS program was used for absorption corrections. The structures were solved by direct methods and refined by the full matrix least squares method on  $F^2$  using the SHELXS 97 and SHELXL 97 programs. All hydrogen atoms were generated geometrically and treated by a mixture of independent and constrained refinements.

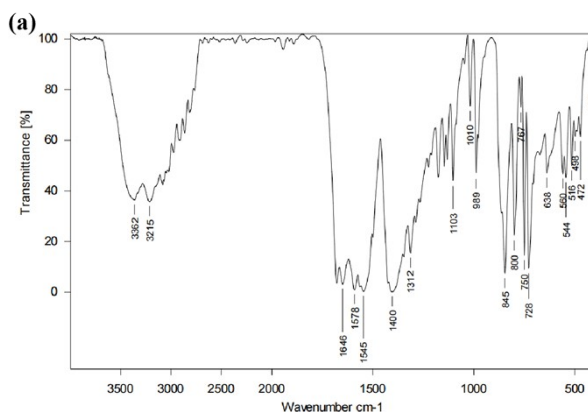

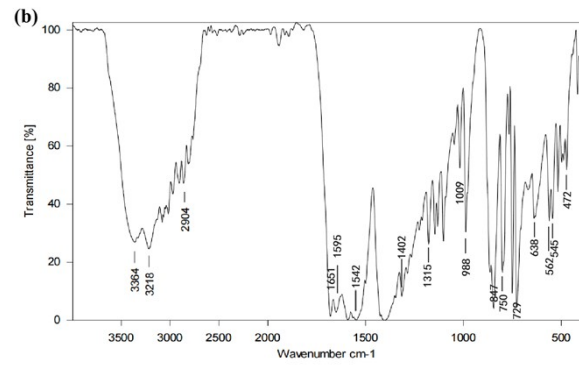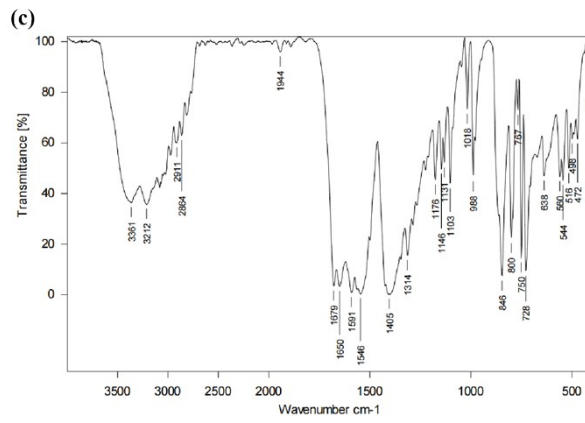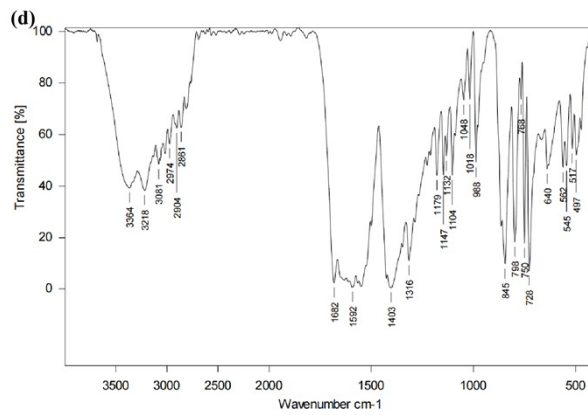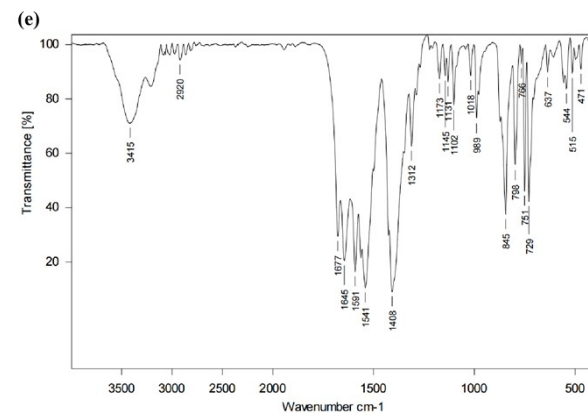

Fig. S1 The IR spectra of the complexes (a) **1** (b) **2** (c) **3** (d) **4** (e) **5**

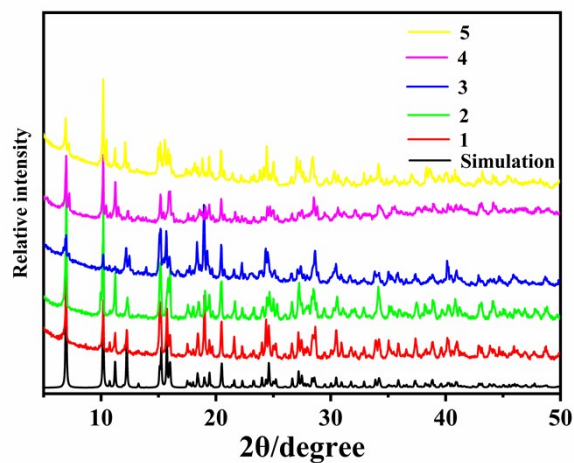

Fig. S2 The PXRD patterns of the complexes **1-5**

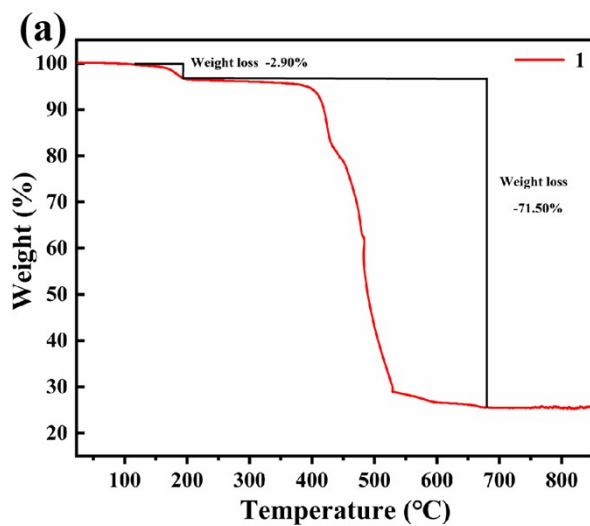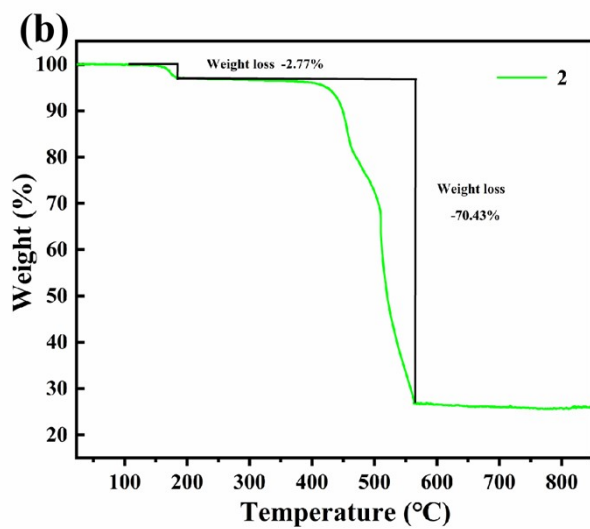

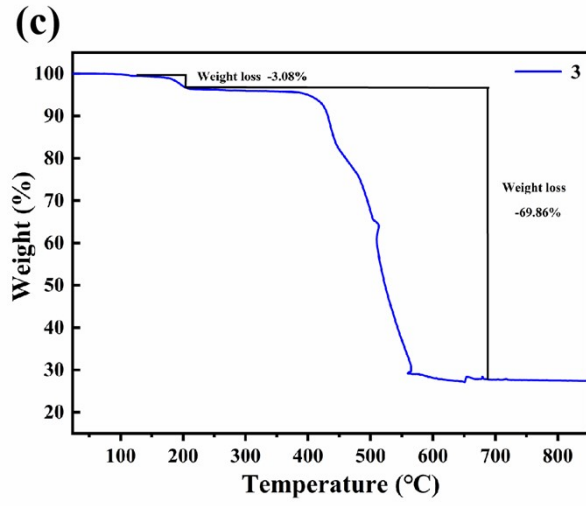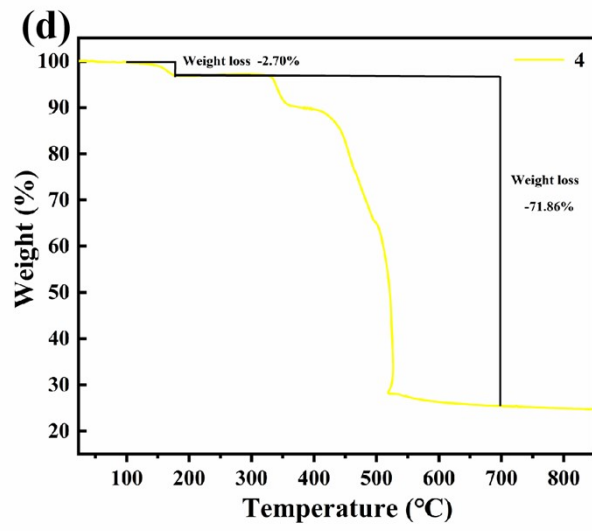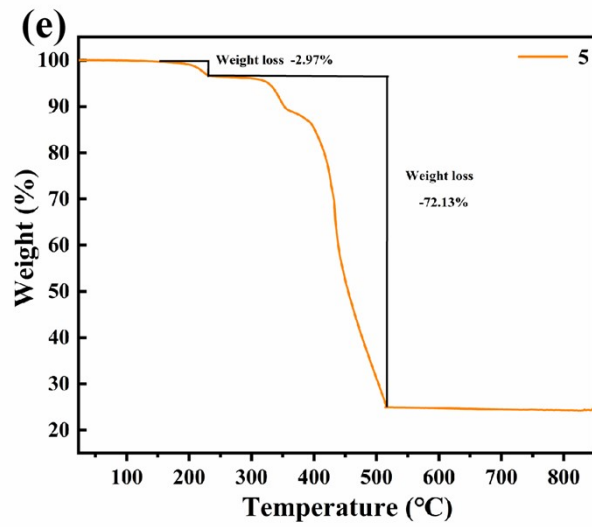

Fig. S3 The TGA curves of (a) 1 (b) 2 (c) 3 (d) 4 (e) 5

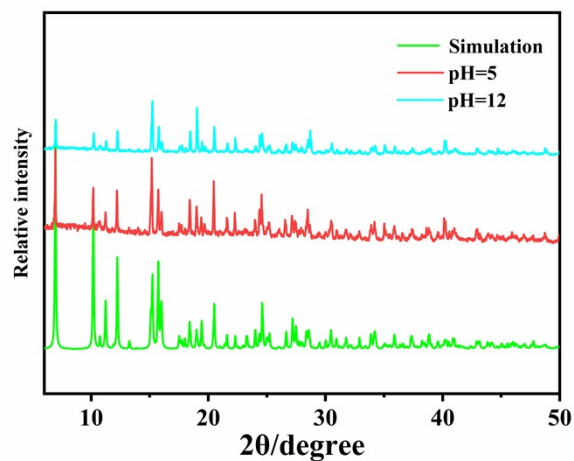

Fig. S4 The PXRD patterns of **1** at different pH solutions

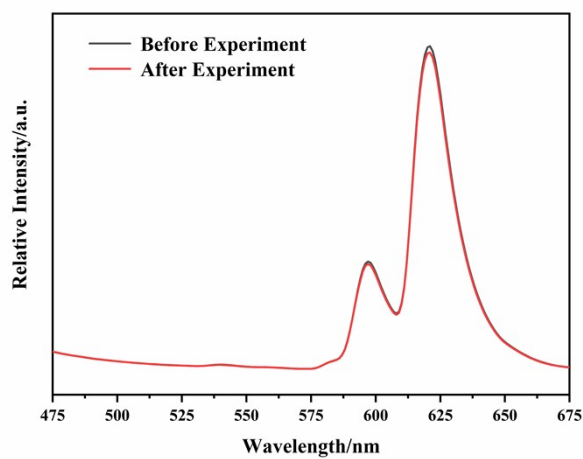

Fig. S5 The luminescence intensity of recovered sample after sensing experiment

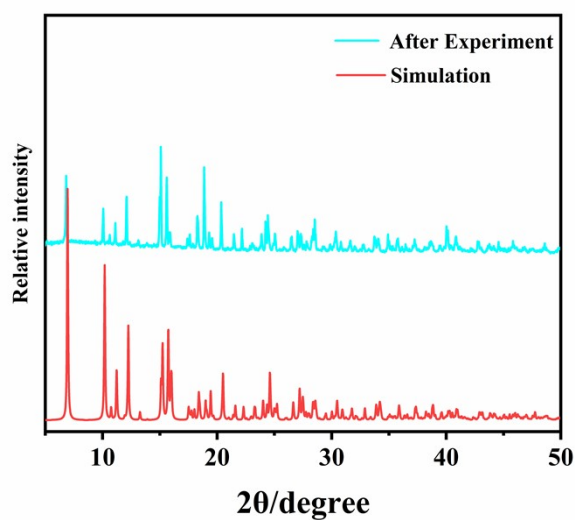

Fig. S6 The PXRD patterns of **1** before and after the experiment

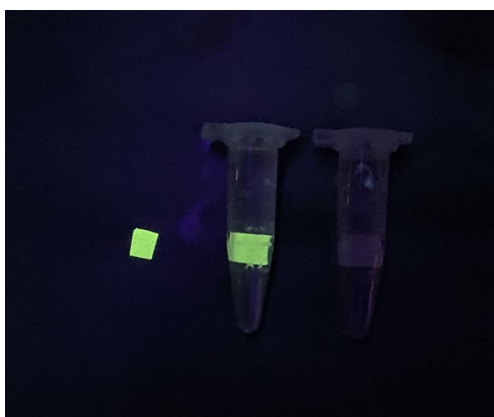

Fig. S7 Film@2 detection of chlorogenic acid with different concentrations

Table S1 Selected bond lengths [ $\text{\AA}$ ] and angles [ $^\circ$ ] for complexes 1-5

| complex 1         |            |                   |            |
|-------------------|------------|-------------------|------------|
| Eu(1)-O(4)        | 2.415(3)   | Eu(1)-O(7)A       | 2.399(3)   |
| Eu(1)-O(2)B       | 2.315(3)   | Eu(1)-O(5)        | 2.526(3)   |
| Eu(1)-O(6)        | 2.435(3)   | Eu(1)-O(1)C       | 2.376(3)   |
| Eu(1)-N(4)        | 2.587(4)   | Eu(1)-N(5)        | 2.566(3)   |
| O(4)-Eu(1)-O(5)   | 141.68(11) | O(4)-Eu(1)-O(6)   | 74.82(10)  |
| O(4)-Eu(1)-N(4)   | 80.52(11)  | O(4)-Eu(1)-N(5)   | 109.20(10) |
| O(7)A-Eu(1)-O(5)  | 137.04(11) | O(7)A-Eu(1)-O(4)  | 79.09(11)  |
| O(7)A-Eu(1)-N(4)  | 124.61(10) | O(7)A-Eu(1)-O(6)  | 67.26(9)   |
| O(2)B-Eu(1)-O(7)A | 140.38(10) | O(7)A-Eu(1)-N(5)  | 75.55(10)  |
| O(2)B-Eu(1)-O(6)  | 74.88(10)  | O(2)B-Eu(1)-O(4)  | 80.21(10)  |
| O(2)B-Eu(1)-N(4)  | 84.27(11)  | O(2)B-Eu(1)-O(5)  | 75.27(10)  |
| O(5)-Eu(1)-N(5)   | 76.87(10)  | O(2)B-Eu(1)-O(1)C | 106.20(11) |
| O(6)-Eu(1)-O(5)   | 124.71(9)  | O(2)B-Eu(1)-N(5)  | 143.63(11) |
| O(6)-Eu(1)-N(5)   | 141.20(10) | O(5)-Eu(1)-N(4)   | 68.23(10)  |
| O(1)C-Eu(1)-O(4)  | 146.42(11) | O(1)C-Eu(1)-N(4)  | 132.36(11) |
| O(1)C-Eu(1)-O(5)  | 69.98(11)  | O(6)-Eu(1)-N(4)   | 149.93(10) |
| O(1)C-Eu(1)-O(7)A | 75.55(11)  | O(1)C-Eu(1)-N(5)  | 85.40(10)  |
| O(1)C-Eu(1)-O(6)  | 75.27(10)  | N(5)-Eu(1)-N(4)   | 63.81(11)  |

A:-X,-Y,1-Z; B:-X,1-Y,1-Z; C:1+X,-1+Y,+Z; D:-1+X,1+Y,+Z

| complex 2   |          |             |          |
|-------------|----------|-------------|----------|
| Tb(1)-O(4)  | 2.286(3) | Tb(1)-O(7)  | 2.499(3) |
| Tb(1)-O(6)  | 2.404(3) | Tb(1)-O(5)A | 2.380(3) |
| Tb(1)-O(2)B | 2.379(3) | Tb(1)-O(3)C | 2.345(3) |

|                   |            |                   |            |
|-------------------|------------|-------------------|------------|
| Tb(1)-N(5)        | 2.535(4)   | Tb(1)-N(4)        | 2.558(4)   |
| O(4)-Tb(1)-O(7)   | 75.53(11)  | O(4)-Tb(1)-O(6)   | 74.72(12)  |
| O(4)-Tb(1)-O(5)A  | 140.90(11) | O(4)-Tb(1)-O(2)B  | 80.94(12)  |
| O(4)-Tb(1)-O(3)C  | 106.38(12) | O(4)-Tb(1)-N(5)   | 144.10(12) |
| O(4)-Tb(1)-N(4)   | 83.66(13)  | O(7)-Tb(1)-N(5)   | 77.34(11)  |
| O(7)-Tb(1)-N(4)   | 68.59(12)  | O(6)-Tb(1)-O(7)   | 125.34(11) |
| O(6)-Tb(1)-N(5)   | 141.03(12) | O(6)-Tb(1)-N(4)   | 148.52(12) |
| O(5)A-Tb(1)-O(7)  | 136.95(12) | O(5)A-Tb(1)-O(6)  | 68.02(10)  |
| O(5)A-Tb(1)-N(5)  | 74.38(12)  | O(5)A-Tb(1)-N(4)  | 123.96(12) |
| O(2)B-Tb(1)-O(7)  | 141.19(12) | O(2)B-Tb(1)-O(6)  | 75.67(12)  |
| O(2)B-Tb(1)-O(5)A | 78.86(12)  | O(2)B-Tb(1)-N(5)  | 107.17(12) |
| O(2)A-Tb(1)-N(4)  | 78.59(13)  | O(3)C-Tb(1)-O(7)  | 70.08(12)  |
| O(3)C-Tb(1)-O(6)  | 75.88(12)  | O(3)C-Tb(1)-O(5)A | 76.00(12)  |
| O(3)C-Tb(1)-O(2)B | 147.41(13) | O(3)C-Tb(1)-N(5)  | 85.68(11)  |
| O(3)C-Tb(1)-N(4)  | 133.16(12) | N(5)-Tb(1)-N(4)   | 64.67(12)  |

A:1-X,-Y,1-Z; B:1-X,1-Y,1-Z; C:-X,-Y,1-Z

### complex 3

|                  |            |                   |            |
|------------------|------------|-------------------|------------|
| Sm(1)-O(3)A      | 2.431(3)   | Sm(1)-O(5)        | 2.414(3)   |
| Sm(1)-O(1)       | 2.335(3)   | Sm(1)-O(7)        | 2.540(3)   |
| Sm(1)-O(6)       | 2.444(2)   | Sm(1)-O(2)B       | 2.392(3)   |
| Sm(1)-N(5)       | 2.581(3)   | Sm(1)-N(4)        | 2.601(3)   |
| O(3)A-Sm(1)-O(7) | 142.20(10) | O(3)A-Sm(1)-O(6)  | 74.37(9)   |
| O(3)A-Sm(1)-N(5) | 110.22(9)  | O(3)A-Sm(1)-N(4)  | 81.41(10)  |
| O(5)-Sm(1)-O(3)A | 79.36(10)  | O(5)-Sm(1)-O(7)   | 136.50(9)  |
| O(5)-Sm(1)-O(6)  | 66.95(8)   | O(5)-Sm(1)-N(5)   | 75.93(9)   |
| O(5)-Sm(1)-N(4)  | 124.92(9)  | O(1)-Sm(1)-O(3)A  | 79.65(9)   |
| O(1)-Sm(1)-O(5)  | 140.10(9)  | O(1)-Sm(1)-O(7)   | 75.78(9)   |
| O(1)-Sm(1)-O(6)  | 74.88(9)   | O(1)-Sm(1)-O(2)B  | 106.27(10) |
| O(1)-Sm(1)-N(5)  | 143.59(10) | O(1)-Sm(1)-N(4)   | 84.56(10)  |
| O(7)-Sm(1)-N(5)  | 76.27(9)   | O(7)-Sm(1)-N(4)   | 68.14(9)   |
| O(6)-Sm(1)-O(7)  | 124.65(8)  | O(6)-Sm(1)-N(5)   | 141.19(9)  |
| O(6)-Sm(1)-N(4)  | 150.52(9)  | O(2)B-Sm(1)-O(3)A | 146.17(10) |
| O(2)B-Sm(1)-O(5) | 75.35(9)   | O(2)B-Sm(1)-O(7)  | 69.51(10)  |
| O(2)B-Sm(1)-O(6) | 75.24(9)   | O(2)B-Sm(1)-N(5)  | 85.05(9)   |
| O(2)B-Sm(1)-N(4) | 131.79(9)  | N(5)-Sm(1)-N(4)   | 63.52(10)  |

A:-X,2-Y,1-Z; B:1-X,1-Y,1-Z; C:-X,1-Y,1-Z

### complex 4

|                   |            |                   |            |
|-------------------|------------|-------------------|------------|
| Dy(1)-O(1)        | 2.273(3)   | Dy(1)-O(3)A       | 2.365(3)   |
| Dy(1)-O(5)        | 2.394(3)   | Dy(1)-O(6)B       | 2.367(3)   |
| Dy(1)-O(7)        | 2.487(3)   | Dy(1)-O(2)C       | 2.335(3)   |
| Dy(1)-N(2)        | 2.526(3)   | Dy(1)-N(1)        | 2.544(3)   |
| O(1)-Dy(1)-O(3)A  | 81.54(9)   | O(1)-Dy(1)-O(5)   | 74.64(9)   |
| O(1)-Dy(1)-O(6)B  | 141.08(9)  | O(1)-Dy(1)-O(7)   | 75.95(9)   |
| O(1)-Dy(1)-O(2)C  | 106.24(10) | O(1)-Dy(1)-N(2)   | 144.06(10) |
| O(1)-Dy(1)-N(1)   | 83.52(10)  | O(3)A-Dy(1)-O(5)  | 75.80(9)   |
| O(3)A-Dy(1)-O(6)B | 78.55(10)  | O(3)A-Dy(1)-O(7)  | 141.16(10) |
| O(3)A-Dy(1)-N(2)  | 106.27(9)  | O(3)A-Dy(1)-N(1)  | 78.12(10)  |
| O(5)-Dy(1)-O(7)   | 126.16(9)  | O(5)-Dy(1)-N(2)   | 141.20(9)  |
| O(5)-Dy(1)-N(1)   | 148.01(10) | O(6)B-Dy(1)-O(5)  | 68.23(9)   |
| O(6)B-Dy(1)-O(7)  | 136.70(10) | O(6)B-Dy(1)-N(2)  | 74.20(9)   |
| O(6)B-Dy(1)-N(1)  | 123.80(9)  | O(7)-Dy(1)-N(2)   | 76.91(9)   |
| O(7)-Dy(1)-N(1)   | 68.31(9)   | O(2)C-Dy(1)-O(3)A | 147.53(10) |
| O(2)C-Dy(1)-O(5)  | 76.12(9)   | O(2)C-Dy(1)-O(6)B | 76.15(10)  |
| O(2)C-Dy(1)-O(7)  | 70.29(10)  | O(2)C-Dy(1)-N(2)  | 86.04(9)   |
| O(2)C-Dy(1)-N(1)  | 133.42(10) | N(2)-Dy(1)-N(1)   | 64.70(10)  |

A:-X,-Y,1-Z; B:-X,1-Y,1-Z; C:1-X,1-Y,1-Z

### complex 5

|                  |            |                   |            |
|------------------|------------|-------------------|------------|
| Ce(1)-O(7)       | 2.597(3)   | Ce(1)-O(5)        | 2.474(3)   |
| Ce(1)-O(3)A      | 2.503(3)   | Ce(1)-O(1)        | 2.399(3)   |
| Ce(1)-O(6)       | 2.504(2)   | Ce(1)-O(2)B       | 2.460(3)   |
| Ce(1)-N(5)       | 2.657(3)   | Ce(1)-N(4)        | 2.686(3)   |
| O(7)-Ce(1)-N(5)  | 76.22(9)   | O(7)-Ce(1)-N(4)   | 67.21(9)   |
| O(5)-Ce(1)-O(7)  | 137.03(10) | O(5)-Ce(1)-O(3)A  | 79.84(10)  |
| O(5)-Ce(1)-O(6)  | 65.34(8)   | O(5)-Ce(1)-N(5)   | 77.63(9)   |
| O(5)-Ce(1)-N(4)  | 125.73(9)  | O(3)A-Ce(1)-O(7)  | 142.31(10) |
| O(3)A-Ce(1)-O(6) | 73.02(9)   | O(3)A-Ce(1)-N(5)  | 113.65(9)  |
| O(3)A-Ce(1)-N(4) | 85.31(10)  | O(1)-Ce(1)-O(7)   | 74.63(9)   |
| O(1)-Ce(1)-O(5)  | 139.23(9)  | O(1)-Ce(1)-O(3)A  | 78.47(9)   |
| O(1)-Ce(1)-O(6)  | 75.45(9)   | O(1)-Ce(1)-O(2)B  | 106.19(10) |
| O(1)-Ce(1)-N(5)  | 142.99(10) | O(1)-Ce(1)-N(4)   | 86.28(10)  |
| O(6)-Ce(1)-O(7)  | 123.43(8)  | O(6)-Ce(1)-N(5)   | 140.85(9)  |
| O(6)-Ce(1)-N(4)  | 153.90(9)  | O(2)B-Ce(1)-O(7)  | 69.68(10)  |
| O(2)B-Ce(1)-O(5) | 74.28(10)  | O(2)B-Ce(1)-O(3)A | 144.51(10) |
| O(2)B-Ce(1)-N(4) | 129.66(9)  | N(5)-Ce(1)-N(4)   | 61.47(10)  |
| O(2)B-Ce(1)-O(6) | 74.29(9)   | O(2)B-Ce(1)-N(5)  | 84.19(9)   |

A:1-X,-Y,1-Z; B:-X,1-Y,1-Z; C:1-X,1-Y,1-Z
